# Supplementary material for: Adverse event profiles of microscopic colitis in the Japanese Adverse Drug Event Report (JADER) database
Source: PubMed Central journal article supplement (PMC9587040; doi:10.1038/s41598-022-22257-2), 2022-10-21
Supplement: 41598_2022_22257_MOESM1_ESM.pdf [file 41598_2022_22257_MOESM1_ESM.pdf]

## Supplementary information

# Adverse event profiles of microscopic colitis in the Japanese Adverse Drug Event Report (JADER) database

**Authors:** Kaito Yamashiro <sup>1,2</sup>, Mika Jouta <sup>2</sup>, Kouichi Hosomi <sup>3</sup>, Satoshi Yokoyama <sup>3</sup>, Yuu Ozaki <sup>2</sup>, Atsushi Hirata <sup>2</sup>, Fumihiko Ogata <sup>1</sup>, Takehiro Nakamura <sup>1</sup>, Shigeharu Tanei <sup>4</sup>, and Naohito Kawasaki <sup>\*.1</sup>

<sup>1</sup> *Laboratory of Public Health, Faculty of Pharmacy, Kindai University, 3-4-1, Kowakae, Higashi-Osaka, Osaka 577-8502, Japan*

<sup>2</sup> *Department of Pharmacy, Kindai University Nara Hospital, 1248-1, Otodacho, Ikoma, Nara 630-0293, Japan*

<sup>3</sup> *Division of Drug Informatics, Faculty of Pharmacy, Kindai University, 3-4-1 Kowakae, Higashi-Osaka, Osaka 577-8502, Japan*

<sup>4</sup> *Faculty of Pharmaceutical Sciences, Nihon Pharmaceutical University, 10281 Komuro, Ina-machi, Kitaadachi-gun, Saitama 362-0806, Japan*

\*Corresponding Author: Naohito Kawasaki, Laboratory of Public Health, Faculty of Pharmacy, Kindai University, 3-4-1, Kowakae, Higashi-Osaka, Osaka 577-8502, Japan  
Email: [Kawasaki@phar.kindai.ac.jp](mailto:Kawasaki@phar.kindai.ac.jp); Telephone number: +81 6-4307-4012

### **This document contains:**

#### **Supplementary Table S1**

The variance inflation factors values of the variables in the final multiple logistic regression model

#### **Supplementary Table S2**

Number of cases and non-cases of microscopic colitis, and crude reporting odds ratio, in the most common therapeutic categories

#### **Supplementary Table S3**

Number of cases and non-cases of microscopic colitis, and crude reporting odds ratio, of microscopic colitis in other drugs

**Supplementary Table S1.** The variance inflation factors values of the variables in the final multiple logistic regression model

|                     | Variance inflation factors |              |            |
|---------------------|----------------------------|--------------|------------|
|                     | All cases                  | Female cases | Male cases |
| Sex (female)        | 1.013                      | N/A          | N/A        |
| Age $\geq$ 60 years | 1.041                      | 1.024        | 1.026      |
| eBMI                |                            |              |            |
| Obese               | 1.049                      | 1.053        | 1.045      |
| Underweight         | 1.050                      | 1.051        | 1.052      |
| Normal              | N/A                        | N/A          | N/A        |
| Lansoprazole        | 1.044                      | 1.021        | 1.028      |
| Aspirin             | 1.102                      | 1.028        | 1.040      |
| Magnesium oxide     | 1.035                      | N/A          | N/A        |
| Nicorandil          | 1.064                      | N/A          | N/A        |
| Diclofenac          | 1.004                      | N/A          | N/A        |
| Rabeprazole         | 1.017                      | N/A          | N/A        |
| Flunitrazepam       | 1.007                      | N/A          | N/A        |
| Vonoprazan          | 1.006                      | N/A          | N/A        |

N/A: not available.

**Supplementary Table S2.** Number of cases and non-cases of microscopic colitis, and crude reporting odds ratio, in the most common therapeutic categories

|                                 | <b>Cases<br/>n = 161</b> | <b>Non-cases<br/>n = 246,836</b> | <b>cROR (95% CI)</b> |
|---------------------------------|--------------------------|----------------------------------|----------------------|
| <b>PPIs</b>                     |                          |                                  |                      |
| Lansoprazole                    | 128                      | 22,387                           | 38.89 (26.52–57.03)  |
| Rabeprazole                     | 8                        | 10,399                           | 1.19 (0.58–2.42)     |
| Esomeprazole                    | 6                        | 8,825                            | 1.04 (0.46–2.36)     |
| Vonoprazan                      | 5                        | 3,978                            | 1.96 (0.80–4.77)     |
| <b>NSAIDs</b>                   |                          |                                  |                      |
| Aspirin                         | 46                       | 20,578                           | 4.40 (3.12–6.19)     |
| Loxoprofen                      | 16                       | 19,087                           | 1.32 (0.79–2.21)     |
| Diclofenac                      | 11                       | 5,544                            | 3.19 (1.73–5.89)     |
| Celecoxib                       | 6                        | 5,409                            | 1.73 (0.76–3.91)     |
| <b>ACE-Is/ARBs</b>              |                          |                                  |                      |
| Candesartan                     | 14                       | 8,704                            | 2.61 (1.51–4.51)     |
| Olmesartan                      | 13                       | 6,527                            | 3.23 (1.83–5.70)     |
| Valsartan                       | 11                       | 8,001                            | 2.19 (1.19–4.04)     |
| Losartan                        | 6                        | 4,441                            | 2.12 (0.93–4.78)     |
| Enalapril                       | 7                        | 3,850                            | 2.87 (1.34–6.12)     |
| <b>Statins</b>                  |                          |                                  |                      |
| Rosuvastatin                    | 14                       | 7,128                            | 3.20 (1.85–5.54)     |
| Atorvastatin                    | 10                       | 8,701                            | 1.81 (0.96–3.44)     |
| Pravastatin                     | 8                        | 4,902                            | 2.58 (1.27–5.26)     |
| <b>β-blockers</b>               |                          |                                  |                      |
| Carvedilol                      | 14                       | 7,700                            | 2.96 (1.71–5.12)     |
| Bisoprolol                      | 12                       | 6,276                            | 3.09 (1.71–5.56)     |
| <b>Bisphosphonates</b>          |                          |                                  |                      |
| Alendronic acid                 | 13                       | 5,260                            | 4.03 (2.29–7.12)     |
| Risedronic acid                 | 5                        | 2,773                            | 2.82 (1.16–6.88)     |
| <b>Calcium channel blockers</b> |                          |                                  |                      |
| Amlodipine                      | 28                       | 26,892                           | 1.72 (1.15–2.59)     |
| Nifedipine                      | 8                        | 8,381                            | 1.49 (0.73–3.03)     |
| Diltiazem                       | 6                        | 2,557                            | 3.70 (1.63–8.37)     |
| Benidipine                      | 6                        | 2,896                            | 3.26 (1.44–7.38)     |

cROR: crude reporting odds ratio; CI: confidence interval.

**Supplementary Table S3.** Number of cases and non-cases of microscopic colitis, and crude reporting odds ratio, of microscopic colitis in other drugs

|                       | <b>Cases<br/>n = 161</b> | <b>Non-cases<br/>n = 246,836</b> | <b>cROR (95% CI)</b> |
|-----------------------|--------------------------|----------------------------------|----------------------|
| Furosemide            | 21                       | 19,267                           | 1.77 (1.12–2.80)     |
| Nicorandil            | 15                       | 4,219                            | 5.91 (3.47–10.06)    |
| Allopurinol           | 15                       | 9,755                            | 2.50 (1.47–4.25)     |
| Magnesium oxide       | 15                       | 25,972                           | 0.87 (0.51–1.49)     |
| Etizolam              | 14                       | 6,785                            | 3.37 (1.95–5.83)     |
| Rebamipide            | 13                       | 14,897                           | 1.37 (0.78–2.41)     |
| Clopidogrel           | 12                       | 5,930                            | 3.27 (1.82–5.89)     |
| Ferrous citrate       | 12                       | 5,302                            | 3.67 (2.04–6.61)     |
| Mecobalamin           | 12                       | 8,240                            | 2.33 (1.29–4.20)     |
| Brotizolam            | 10                       | 8,576                            | 1.84 (0.97–3.49)     |
| Teprenone             | 10                       | 6,842                            | 2.32 (1.22–4.41)     |
| Prednisolone          | 10                       | 25,380                           | 0.58 (0.30–1.10)     |
| Ursodeoxycholic acid  | 9                        | 9,343                            | 1.51 (0.77–2.95)     |
| Alfacalcidol          | 9                        | 7,871                            | 1.80 (0.92–3.52)     |
| Cilostazol            | 8                        | 3,663                            | 3.47 (1.70–7.07)     |
| Warfarin              | 8                        | 8,533                            | 1.46 (0.72–2.97)     |
| Zolpidem              | 8                        | 7,352                            | 1.70 (0.84–3.47)     |
| Mosapride             | 7                        | 5,245                            | 2.09 (0.98–4.47)     |
| Febuxostat            | 6                        | 5,803                            | 1.61 (0.71–3.64)     |
| Spirolactone          | 6                        | 8,167                            | 1.13 (0.50–2.56)     |
| Flunitrazepam         | 6                        | 4,224                            | 2.22 (0.98–5.03)     |
| Loperamide            | 6                        | 2,223                            | 4.26 (1.88–9.64)     |
| Isosorbide nitrate    | 5                        | 3,049                            | 2.56 (1.05–6.25)     |
| Apixaban              | 5                        | 2,931                            | 2.67 (1.09–6.50)     |
| Triazolam             | 5                        | 2,636                            | 2.97 (1.22–7.24)     |
| Albumin tannate       | 5                        | 603                              | 13.09 (5.35–32.00)   |
| Tocopherol nicotinate | 5                        | 1,722                            | 4.56 (1.87–11.13)    |
| Famotidine            | 5                        | 19,799                           | 0.37 (0.15–0.90)     |

cROR: crude reporting odds ratio; CI: confidence interval.
